# Supplementary material for: The effect of halogen bonding on protonated hexacyanoferrate networks in hexacyanoferrates of halogenopyridines
Source: Royal Society of Chemistry journal article supplement (doi:10.1039/d0ce01359e), 2020-01-01
Supplement: d0ce01359e1.pdf [file d0ce01359e1.pdf]

## SUPPORTING INFORMATION

# The effect of halogen bonding on protonated hexacyanoferrate networks in hexacyanoferrates of halogenopyridines

Nikola Jakupec, Luka Fotović and Vladimir Stilinović

*Department of Chemistry, Faculty of Science, University of Zagreb, Horvatovac 102a,  
HR-10000 Zagreb, Croatia*

Email: vstilinovic@chem.pmf.hr

Fax: +385 1 4606 341

Tel: +385 1 4606 371

### Table of Contents

| Item                                                                                    | Page |
|-----------------------------------------------------------------------------------------|------|
| <b>Table S1</b> (Crystallographic data)                                                 | 2    |
| <b>Figures S1–S7</b> (ORTEP representations of the formula units of prepared compounds) | 4    |
| X-ray structural analysis                                                               | 7    |
| <b>Figures S8–S14</b> (XRPD patterns of the prepared compounds)                         | 8    |
| <b>Figures S15–S18</b> (DSC and TG curves of the prepared compounds)                    | 9    |
| <b>Figures S19–S22</b> (IR spectra of the prepared compounds)                           | 14   |
| <b>Table S2</b> (CSD)                                                                   | 16   |
| References                                                                              | 16   |

**Table S1.** Crystal data and refinement details for the prepared salts.

|                                                                        | <b>I</b>                                                                         | <b>II</b>                                                                       | <b>III</b>                                                      | <b>IV</b>                                                                                      |
|------------------------------------------------------------------------|----------------------------------------------------------------------------------|---------------------------------------------------------------------------------|-----------------------------------------------------------------|------------------------------------------------------------------------------------------------|
| Molecular formula                                                      | C <sub>26</sub> H <sub>26</sub> Cl <sub>2</sub> FeN <sub>10</sub> O <sub>2</sub> | C <sub>58</sub> H <sub>44</sub> Br <sub>8</sub> Fe <sub>3</sub> N <sub>26</sub> | C <sub>16</sub> H <sub>12</sub> FeI <sub>2</sub> N <sub>8</sub> | C <sub>34</sub> H <sub>32</sub> Cl <sub>4</sub> Fe <sub>2</sub> N <sub>16</sub> O <sub>2</sub> |
| $M_r$                                                                  | 574.35                                                                           | 1911.90                                                                         | 626.00                                                          | 950.20                                                                                         |
| Crystal system                                                         | monoclinic                                                                       | monoclinic                                                                      | monoclinic                                                      | triclinic                                                                                      |
| Space group                                                            | $P 2_1/n$                                                                        | $P 2_1/n$                                                                       | $P 2_1/n$                                                       | $P -1$                                                                                         |
| Crystal data:                                                          |                                                                                  |                                                                                 |                                                                 |                                                                                                |
| $a / \text{\AA}$                                                       | 8.7562(6)                                                                        | 19.931(2)                                                                       | 8.3887(4)                                                       | 8.1771(9)                                                                                      |
| $b / \text{\AA}$                                                       | 13.1732(10)                                                                      | 12.6943(14)                                                                     | 9.6390(5)                                                       | 11.2544(12)                                                                                    |
| $c / \text{\AA}$                                                       | 12.6457(7)                                                                       | 30.341(3)                                                                       | 13.2734(7)                                                      | 12.1692(15)                                                                                    |
| $\alpha / ^\circ$                                                      | 90                                                                               | 90                                                                              | 90                                                              | 91.426(9)                                                                                      |
| $\beta / ^\circ$                                                       | 95.040(6)                                                                        | 93.819(8)                                                                       | 99.110(5)                                                       | 108.865(10)                                                                                    |
| $\gamma / ^\circ$                                                      | 90                                                                               | 90                                                                              | 90                                                              | 90.318(9)                                                                                      |
| $V / \text{\AA}^3$                                                     | 1453.01                                                                          | 7659.53                                                                         | 1059.73                                                         | 1059.32                                                                                        |
| $Z$                                                                    | 2                                                                                | 4                                                                               | 2                                                               | 1                                                                                              |
| $D_{\text{calc}} / \text{g cm}^{-3}$                                   | 1.46                                                                             | 1.66                                                                            | 1.96                                                            | 1.49                                                                                           |
| $\lambda(\text{MoK}\alpha) / \text{\AA}$                               | 0.71073                                                                          | 0.71073                                                                         | 0.71073                                                         | 0.71073                                                                                        |
| $T / \text{K}$                                                         | 295                                                                              | 295                                                                             | 295                                                             | 295                                                                                            |
| Crystal size / mm <sup>3</sup>                                         | 0.20 x 0.18 x 0.16                                                               | 0.12 x 0.09 x 0.06                                                              | 0.28 x 0.20 x 0.12                                              | 0.32 x 0.22 x 0.12                                                                             |
| $\mu / \text{mm}^{-1}$                                                 | 0.746                                                                            | 4.787                                                                           | 3.642                                                           | 0.989                                                                                          |
| $F(000)$                                                               | 656                                                                              | 3728                                                                            | 592                                                             | 484                                                                                            |
| Refl. collected/unique                                                 | 5298 / 2531                                                                      | 13322 / 7459                                                                    | 10615 / 2306                                                    | 8386 / 4211                                                                                    |
| Data/restraints/parameters                                             | 174                                                                              | 402                                                                             | 132                                                             | 278                                                                                            |
| $\Delta\rho_{\text{max}}, \Delta\rho_{\text{min}} / \text{e \AA}^{-3}$ | 0.71; -0.99                                                                      | 1.64; -1.63                                                                     | 1.19; -1.21                                                     | 0.52; -0.59                                                                                    |
| $R[F^2 > 4\sigma(F^2)]$                                                | 0.066                                                                            | 0.1075                                                                          | 0.0392                                                          | 0.0433                                                                                         |
| $wR(F^2)$                                                              | 0.144                                                                            | 0.281                                                                           | 0.093                                                           | 0.074                                                                                          |
| Goodness-of-fit, $S$                                                   | 0.845                                                                            | 1.018                                                                           | 1.046                                                           | 1.020                                                                                          |

**Table S1.** Continued.

|                                                                        | <b>V</b>                                                                        | <b>VI</b>                                                                      | <b>VII</b>                                                                     |
|------------------------------------------------------------------------|---------------------------------------------------------------------------------|--------------------------------------------------------------------------------|--------------------------------------------------------------------------------|
| Molecular formula                                                      | C <sub>16</sub> H <sub>16</sub> Br <sub>2</sub> FeN <sub>8</sub> O <sub>2</sub> | C <sub>16</sub> H <sub>16</sub> FeI <sub>2</sub> N <sub>8</sub> O <sub>2</sub> | C <sub>18</sub> H <sub>20</sub> FeI <sub>2</sub> N <sub>8</sub> O <sub>2</sub> |
| $M_r$                                                                  | 568.00                                                                          | 662.00                                                                         | 690.1                                                                          |
| Crystal system                                                         | monoclinic                                                                      | monoclinic                                                                     | monoclinic                                                                     |
| Space group                                                            | <i>C</i> 2/ <i>c</i>                                                            | <i>C</i> 2/ <i>c</i>                                                           | <i>P</i> 2 <sub>1</sub> / <i>c</i>                                             |
| Crystal data:                                                          |                                                                                 |                                                                                |                                                                                |
| $a / \text{\AA}$                                                       | 14.7058(15)                                                                     | 14.9231(14)                                                                    | 8.8231(4)                                                                      |
| $b / \text{\AA}$                                                       | 8.3867(6)                                                                       | 8.4115(7)                                                                      | 11.0729(3)                                                                     |
| $c / \text{\AA}$                                                       | 18.3571(18)                                                                     | 18.7857(16)                                                                    | 13.2703(7)                                                                     |
| $\alpha / ^\circ$                                                      | 90                                                                              | 90                                                                             | 90                                                                             |
| $\beta / ^\circ$                                                       | 108.439(11)                                                                     | 108.571(9)                                                                     | 106.027(5)                                                                     |
| $\gamma / ^\circ$                                                      | 90                                                                              | 90                                                                             | 90                                                                             |
| $V / \text{\AA}^3$                                                     | 2147.81                                                                         | 2235.3                                                                         | 728.25(5)                                                                      |
| $Z$                                                                    | 4                                                                               | 4                                                                              | 2                                                                              |
| $D_{\text{calc}} / \text{g cm}^{-3}$                                   | 1.76                                                                            | 1.97                                                                           | 1.84                                                                           |
| $\lambda(\text{MoK}\alpha) / \text{\AA}$                               | 0.71073                                                                         | 0.71073                                                                        | 0.71073                                                                        |
| $T / \text{K}$                                                         | 295                                                                             | 295                                                                            | 295                                                                            |
| Crystal size / mm <sup>3</sup>                                         | 0.32 x 0.29 x 0.26                                                              | 0.35 x 0.30 x 0.25                                                             | 0.34 x 0.25 x 0.16                                                             |
| $\mu / \text{mm}^{-1}$                                                 | 4.452                                                                           | 3.456                                                                          | 3.112                                                                          |
| $F(000)$                                                               | 1120                                                                            | 1264                                                                           | 664                                                                            |
| Refl. collected/unique                                                 | 7901 / 2302                                                                     | 6293 / 2422                                                                    | 7757 / 2680                                                                    |
| Data/restraints/<br>parameters                                         | 145                                                                             | 145                                                                            | 140                                                                            |
| $\Delta\rho_{\text{max}}, \Delta\rho_{\text{min}} / \text{e \AA}^{-3}$ | 0.66; -0.59                                                                     | 1.34; -1.43                                                                    | 0.75; -0.49                                                                    |
| $R[F^2 > 4\sigma(F^2)]$                                                | 0.0309                                                                          | 0.0442                                                                         | 0.0301                                                                         |
| $wR(F^2)$                                                              | 0.072                                                                           | 0.112                                                                          | 0.064                                                                          |
| Goodness-of-fit, $S$                                                   | 1.075                                                                           | 1.036                                                                          | 0.872                                                                          |

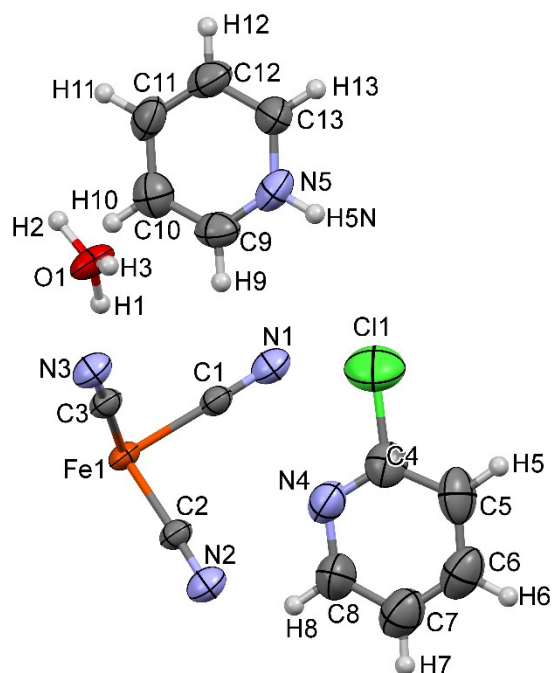

**Figure S1.** Ortep plot of the asymmetric unit of **I** showing the atom-labelling scheme. Displacement ellipsoids are drawn at the 50 % probability level, and H atoms are shown as small spheres of arbitrary radius.

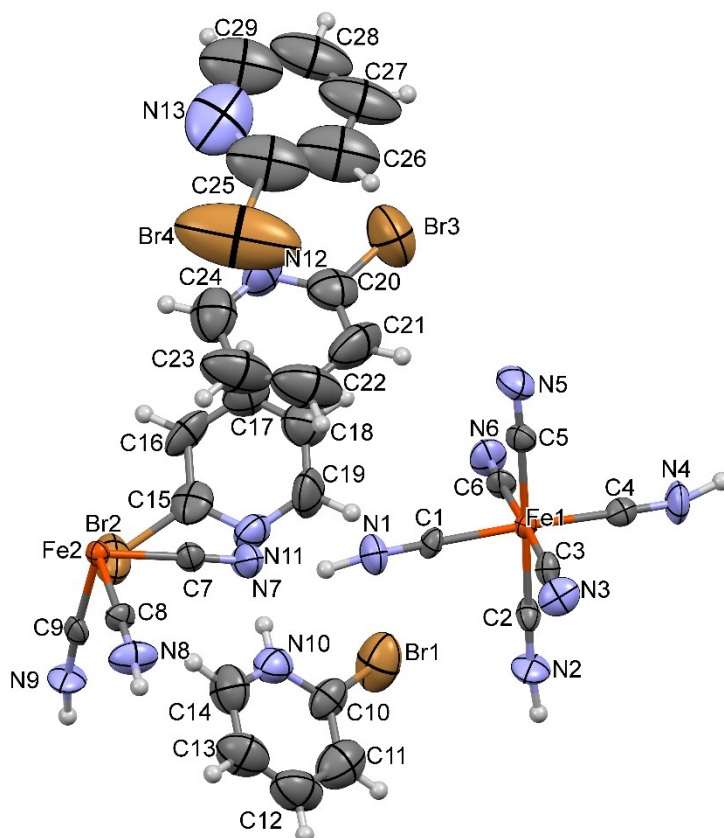

**Figure S2.** Ortep plot of the asymmetric unit of **II** showing the atom-labelling scheme. Displacement ellipsoids are drawn at the 50 % probability level, and H atoms are shown as small spheres of arbitrary radius.

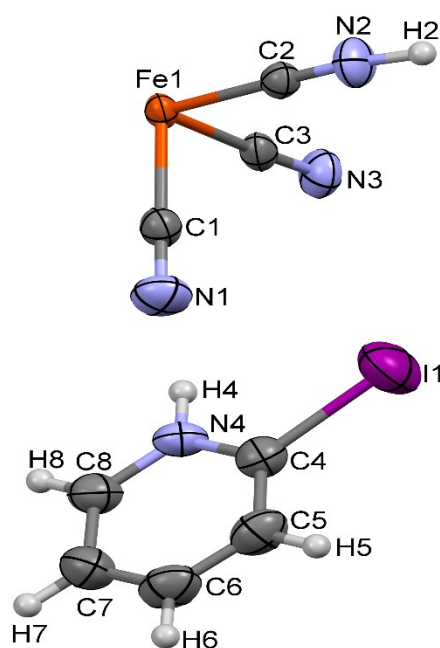

**Figure S3.** Ortep plot of the asymmetric unit of **III** showing the atom-labelling scheme. Displacement ellipsoids are drawn at the 50 % probability level, and H atoms are shown as small spheres of arbitrary radius.

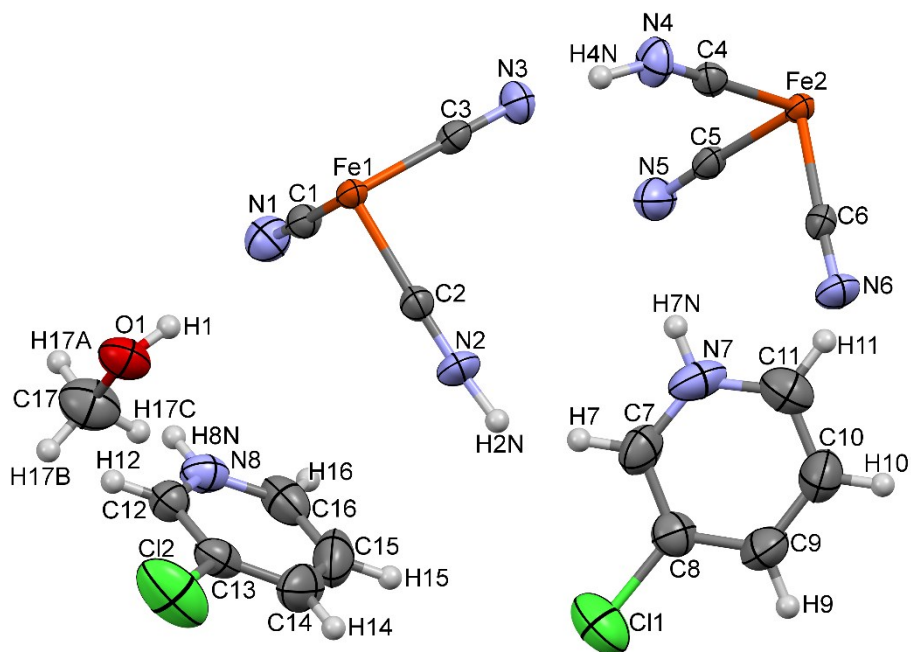

**Figure S4.** Ortep plot of the asymmetric unit of **IV** showing the atom-labelling scheme. Displacement ellipsoids are drawn at the 50 % probability level, and H atoms are shown as small spheres of arbitrary radius.

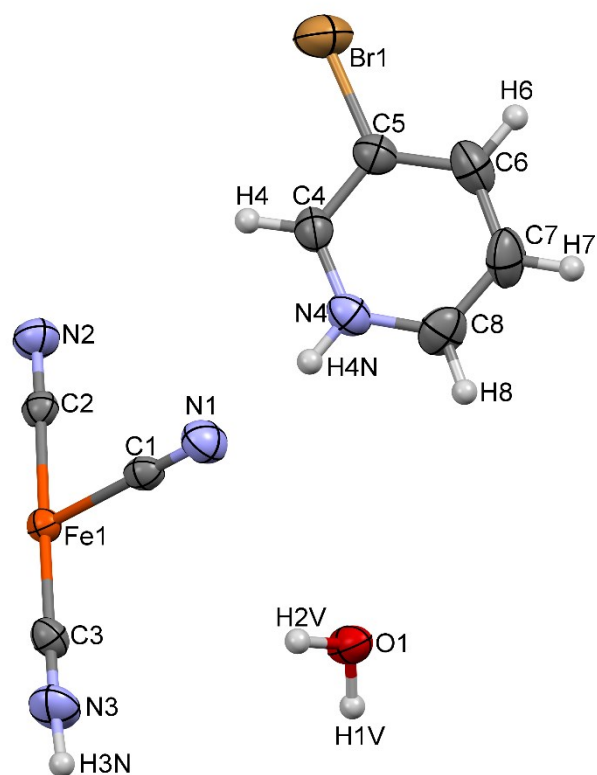

**Figure S5.** Ortep plot of the asymmetric unit of **V** showing the atom-labelling scheme. Displacement ellipsoids are drawn at the 50 % probability level, and H atoms are shown as small spheres of arbitrary radius.

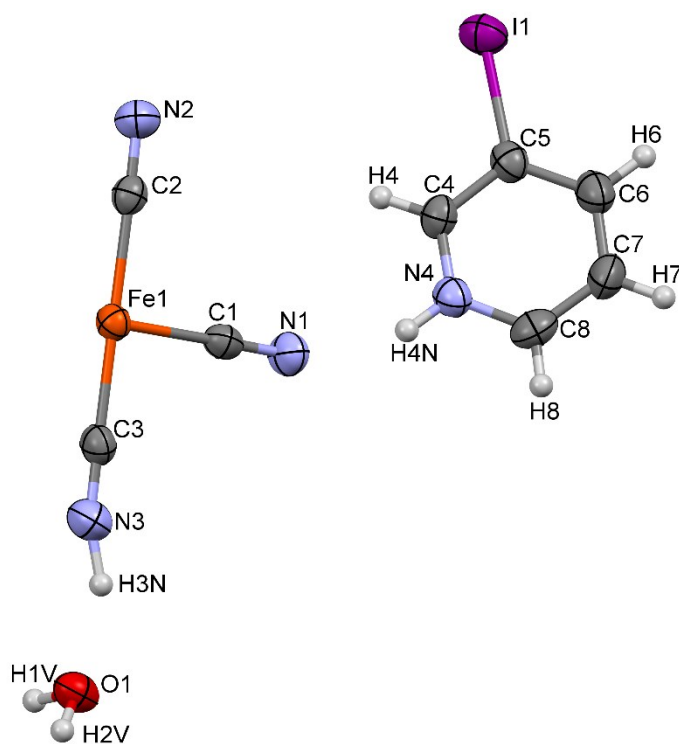

**Figure S6.** Ortep plot of the asymmetric unit of **VI** showing the atom-labelling scheme. Displacement ellipsoids are drawn at the 50 % probability level, and H atoms are shown as small spheres of arbitrary radius.

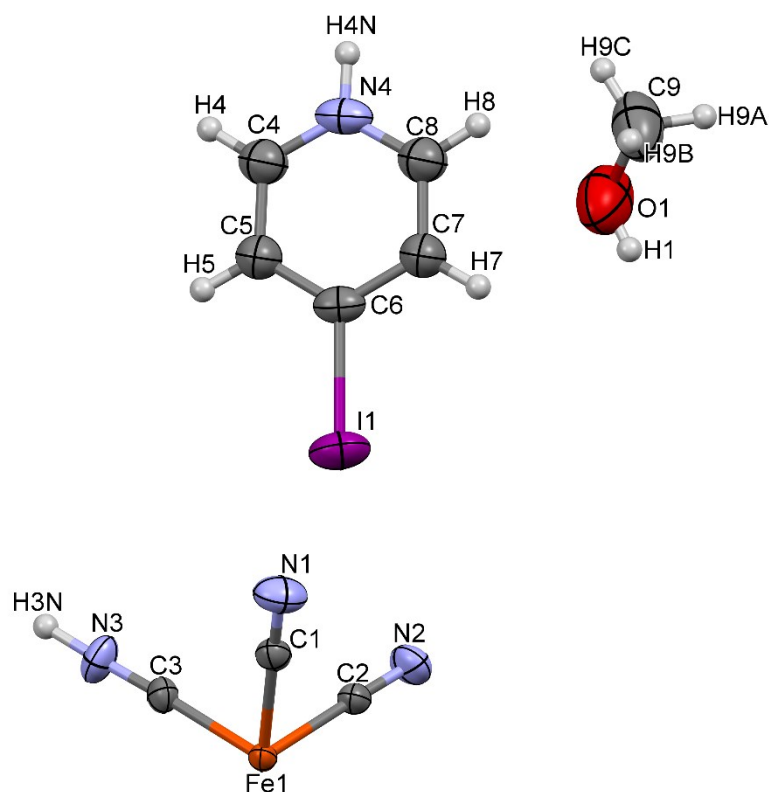

**Figure S7.** Ortep plot of the asymmetric unit of **VII** showing the atom-labelling scheme. Displacement ellipsoids are drawn at the 50 % probability level, and H atoms are shown as small spheres of arbitrary radius.

### X-ray structural analysis

Diffraction measurements were made on an Oxford Diffraction Xcalibur Kappa CCD X-ray diffractometer with graphite-monochromated Mo  $K\alpha$  ( $\lambda = 0.71073 \text{ \AA}$ ) radiation.[17] The data sets were collected using the  $\omega$ -scan mode over a  $2\theta$  range up to  $54^\circ$ . The structures were solved by SHELXT or by direct methods using the SHELXS and refined using SHELXL programs.[18] The structural refinement was performed on  $F^2$  using all data. The hydrogen atoms not involved in hydrogen bonding were placed in calculated positions and treated as riding on their parent, while those involved in hydrogen bonding were located from the electron difference map whenever data quality was sufficient to render it possible. All calculations were performed, and the drawings were prepared using the WinGX crystallographic suite of programs.[19] Molecular structures of compounds are presented by ORTEP-3 [20] and their packing diagrams were prepared using Mercury.[21] The crystal data and measurement details are listed in Table S1. Further details are available in the Supporting Information and from the Cambridge Crystallographic Centre with quotation numbers 2031799-2031805.

A number of difficulties were encountered in the refinement of the structural models, mostly because of weak diffraction of the samples and because of the proton transfer between the hexacyanoferrate anions and water molecules or disordered solvent molecules placed in the voids of the hexacyanoferrate networks. It was therefore necessary to introduce multiple

restraints of bond distances and angles as well as thermal parameters in these parts of the structures.

In **I**, all the  $\text{H}_3\text{O}^+$  protons were located from the electron difference map. The position of the proton in the  $[\mathbf{2-Clpy}\cdots\text{H}\cdots\mathbf{py}]^+$  cation could not be reliably located from the electron difference map, and was located on the pyridine molecule according to the respective  $\text{p}K_a$  values of 2-chloropyridine and pyridine (0.49 and 5.14 in water at 25 °C respectively [22]). In **II**, the H3 proton is located close, but not quite exactly on the 2-fold axis and was modelled as disordered about the twofold axis with identical occupancy (0.50) for both positions. The remaining hexacyanoferrate hydrogen atoms were located from the electron difference map with several restraints of bond distances and angles according to the geometry of the molecules. The hydrogen atom within the  $[\mathbf{2-Brpy}\cdots\text{H}\cdots\mathbf{2-Brpy}]^+$  two-molecular cations was located from the electron difference map and isotropically refined. To offset the charge of the anions of the remaining two symmetrically independent **2-Brpy** molecules must also be protonated, albeit with 50% probability. As one of the two symmetrically independent **2-Brpy** molecules is obviously an acceptor of a C-H $\cdots$ N hydrogen bond, the required 0.5 hydrogen atom was placed on the other. This molecule is severely disordered (probably due to this partial protonation), and locating the proton from the electron difference map was not possible, rather it was modelled as riding on the parent nitrogen. The modelling of the disorder also required multiple restraints of bond distances and angles as well as thermal parameters. In **IV** no reasonable positions of hydrogen atoms could be deduced from the electron difference map and all the hydrogen atoms were modelled as riding on parent nitrogen atoms. In the case of hydrogen bonded protonated cyanide nitrogen, the hydrogen position was modelled as disordered over two positions. In both **V** and **VI** the water and  $\text{H}_2[\text{Fe}(\text{CN})_6]^{2-}$  hydrogen bonding atoms were located in the electron difference map, while the hydrogen atoms on **3-BrpyH**<sup>+</sup> and **3-IpyH**<sup>+</sup> pyridine nitrogen were placed on calculated positions as riding on the parent nitrogen.

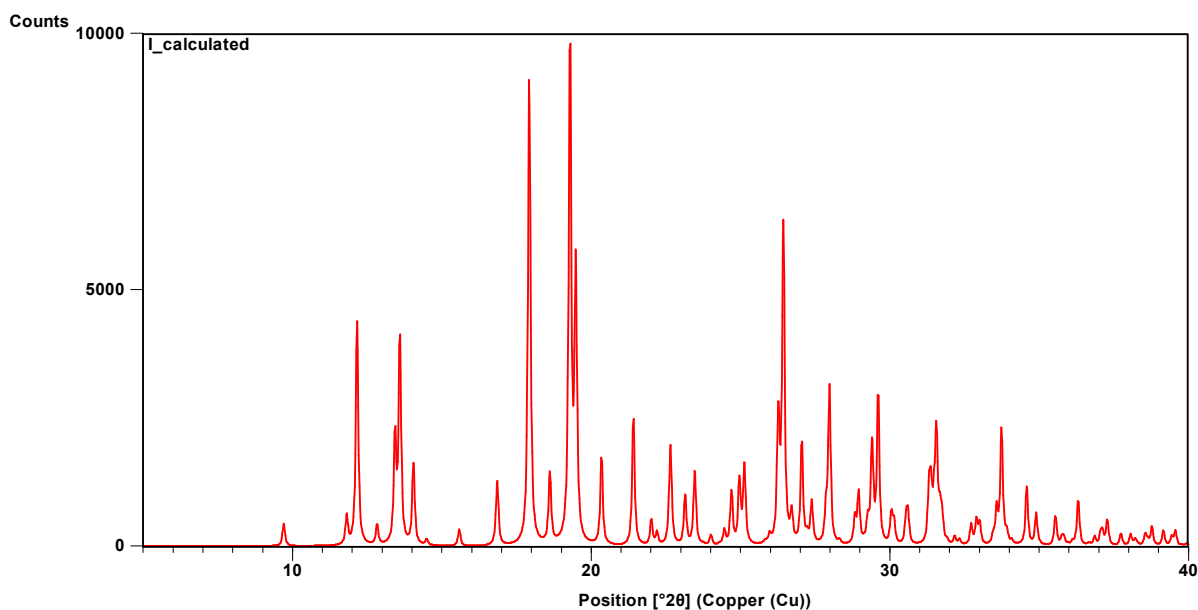

Figure S8. Calculated XRPD patterns of **I**.



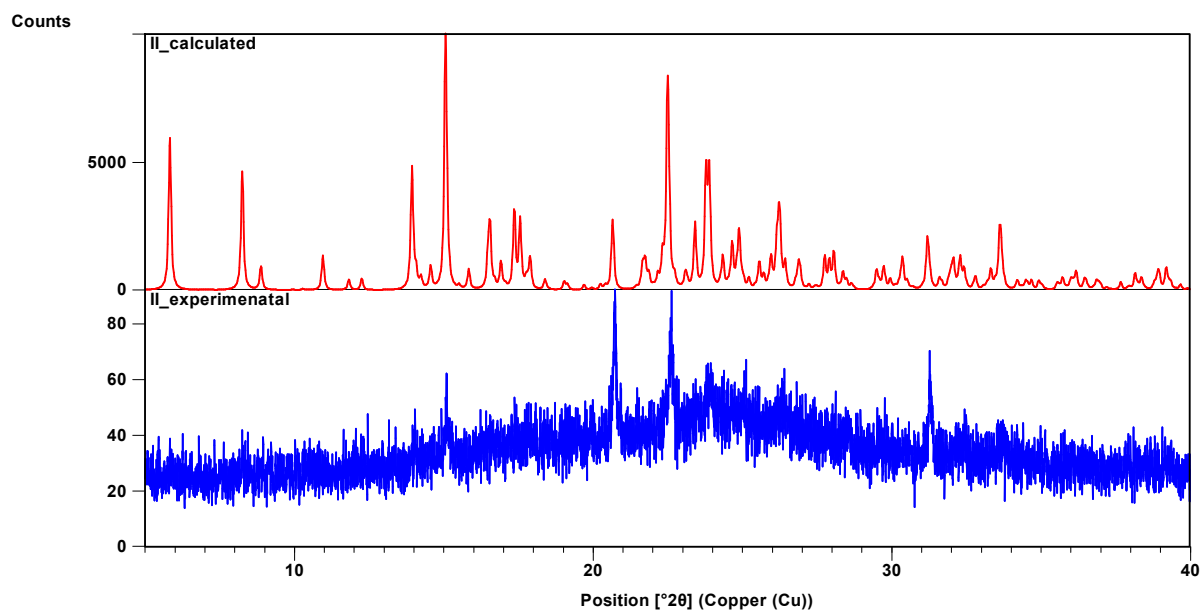

Figure S9. Measured and calculated XRPD patterns of **II**.

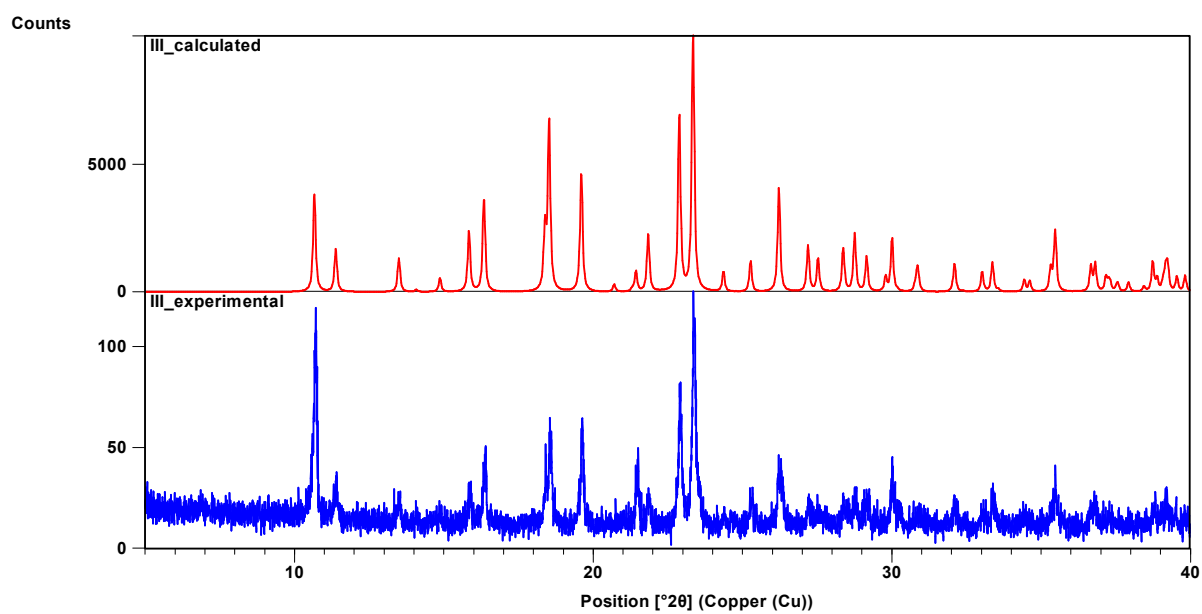

Figure S10. Measured and calculated XRPD patterns of **III**.

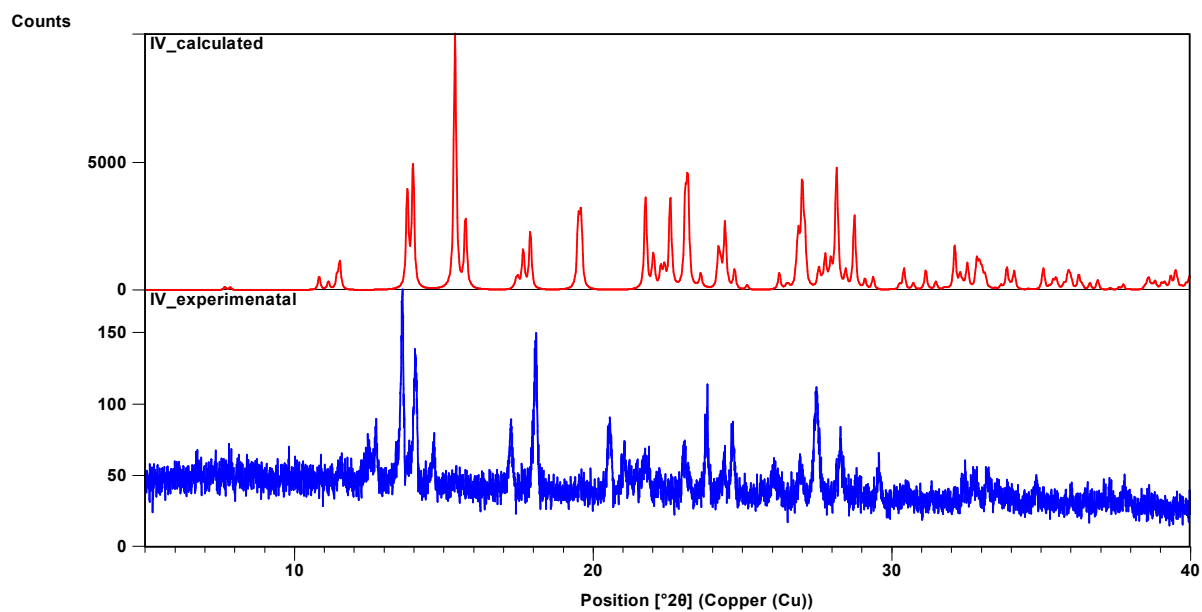

Figure S11. Measured and calculated XRPD patterns of **IV**.

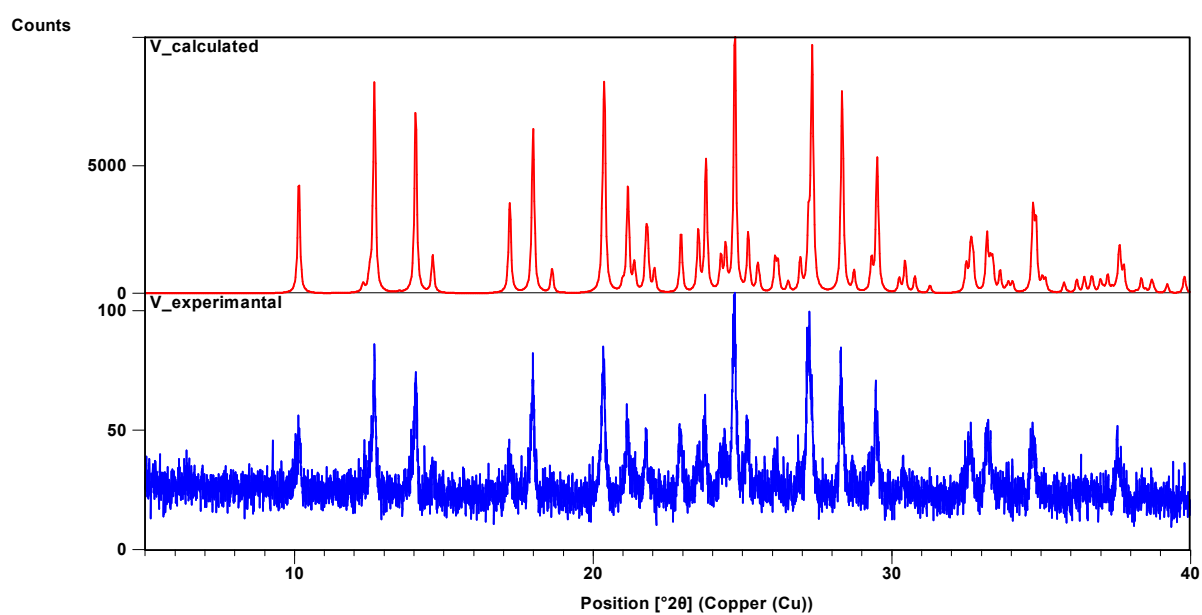

Figure S12. Measured and calculated XRPD patterns of **V**.

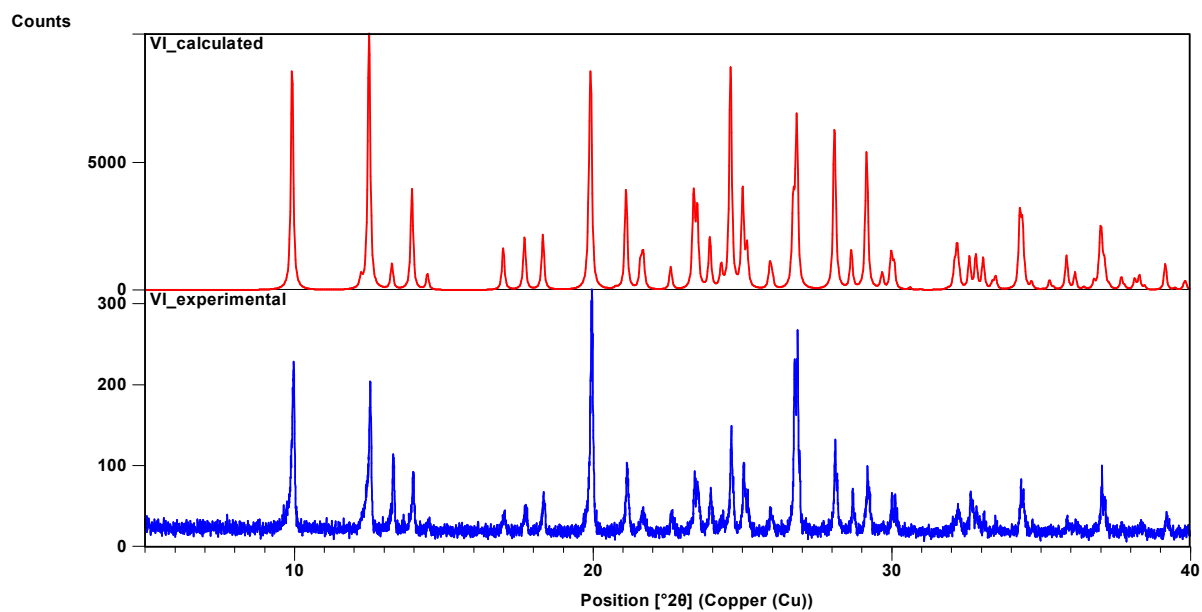

Figure S13. Measured and calculated XRPD patterns of VI.

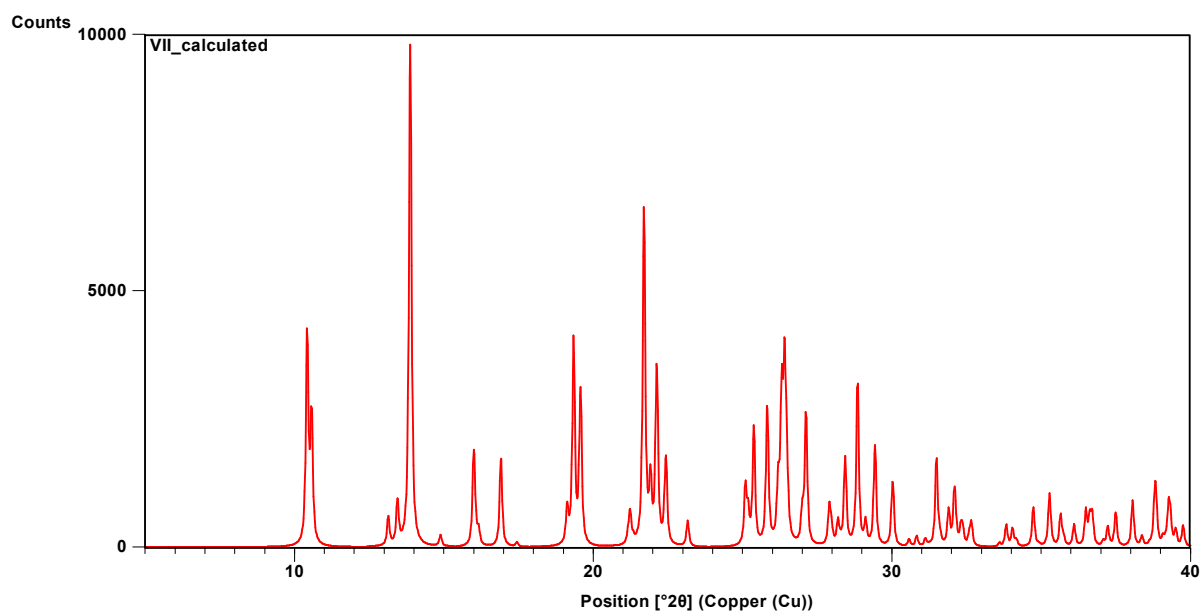

Figure S14. Calculated XRPD patterns of VII.

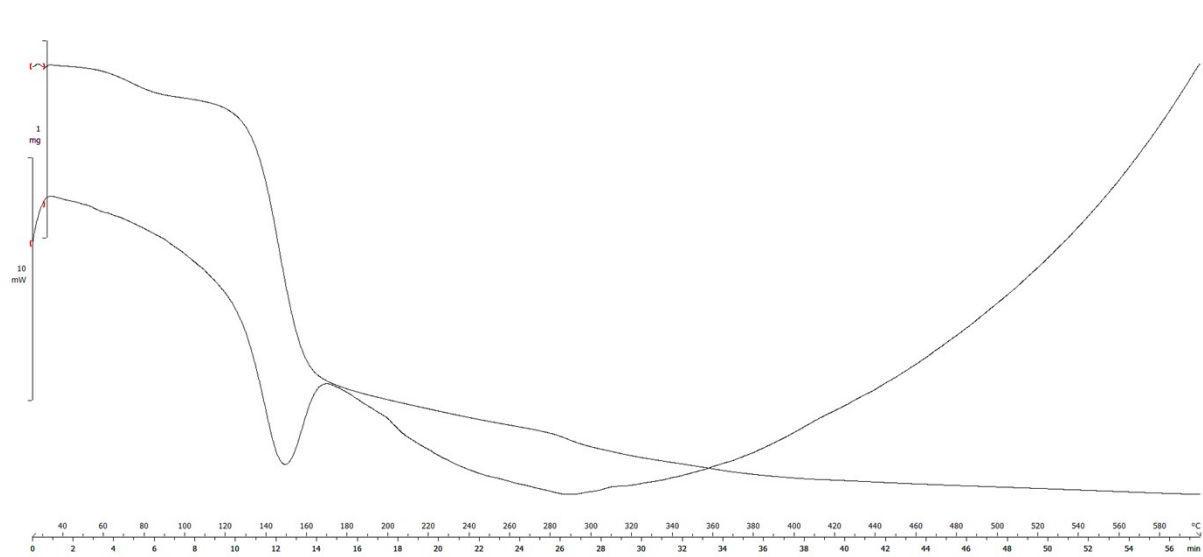

Figure S15. DSC and TG thermogram of **II**.

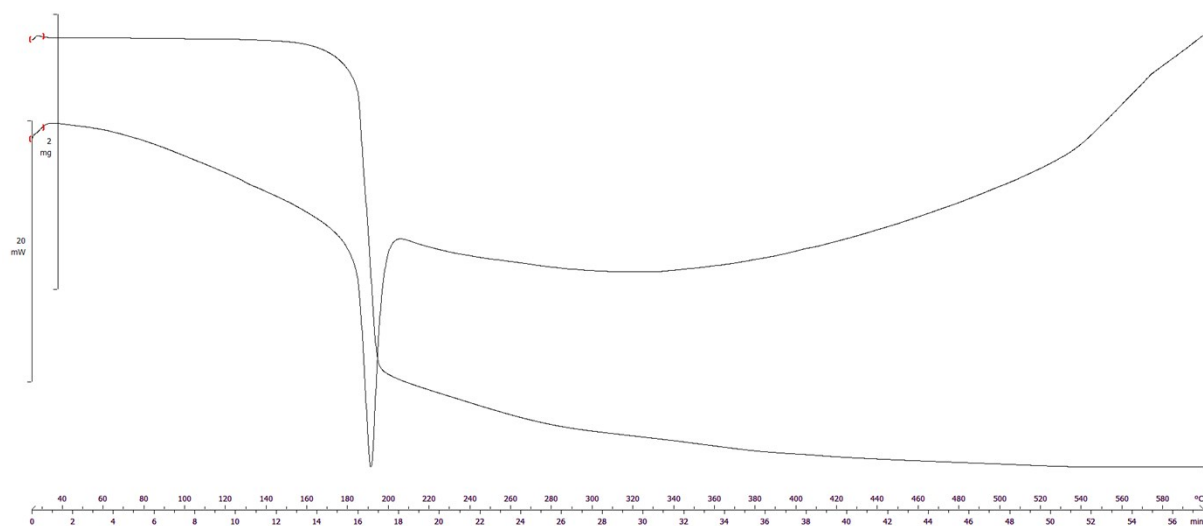

Figure S16. DSC and TG thermogram of **III**.

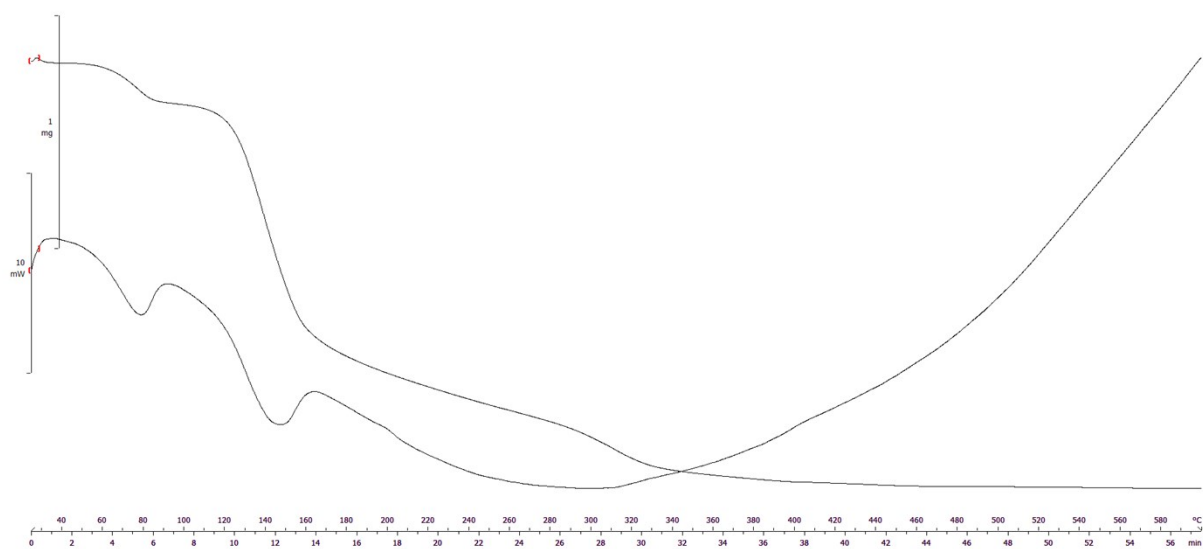

Figure S17. DSC and TG thermogram of **V**.

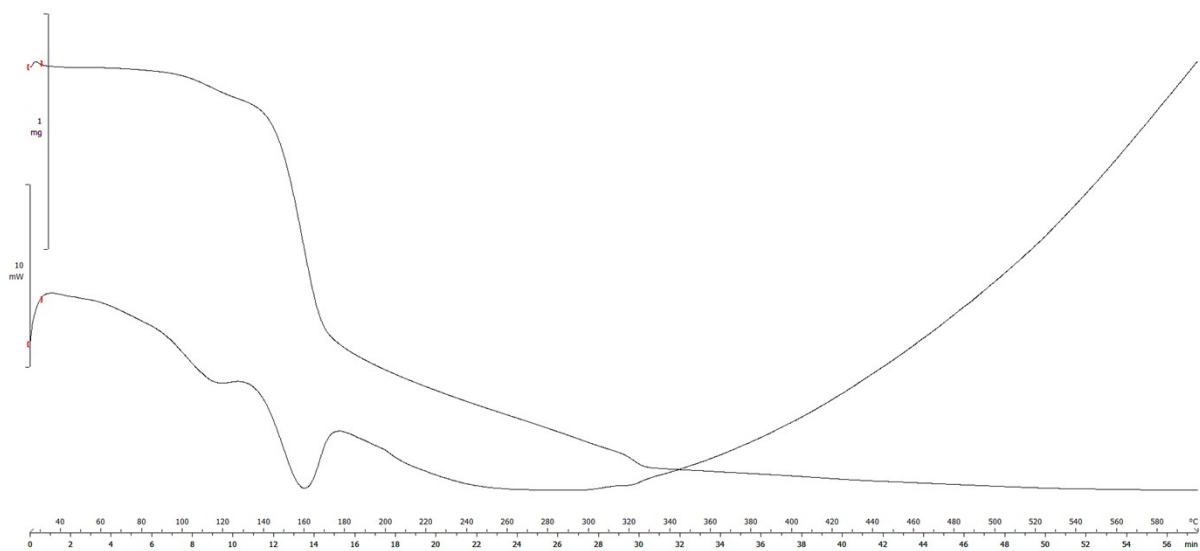

Figure S18. DSC and TG thermogram of **VI**.

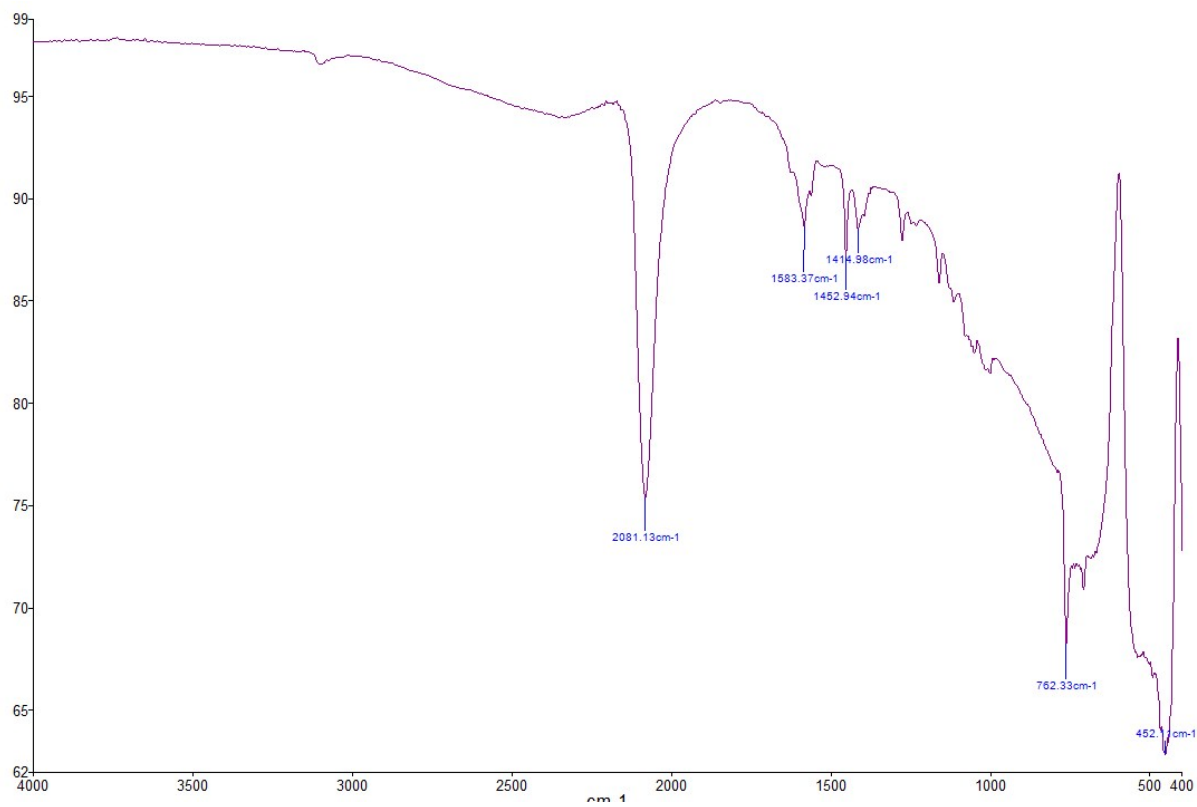

Figure S19. IR spectra of II.

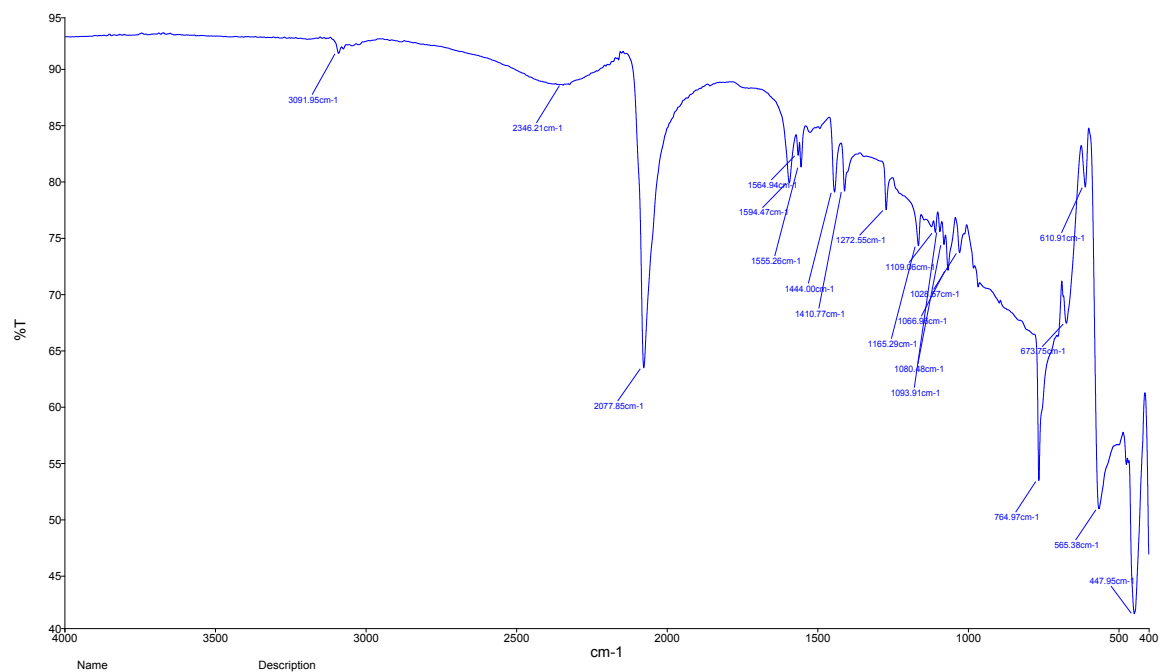

Figure S20. IR spectra of III.

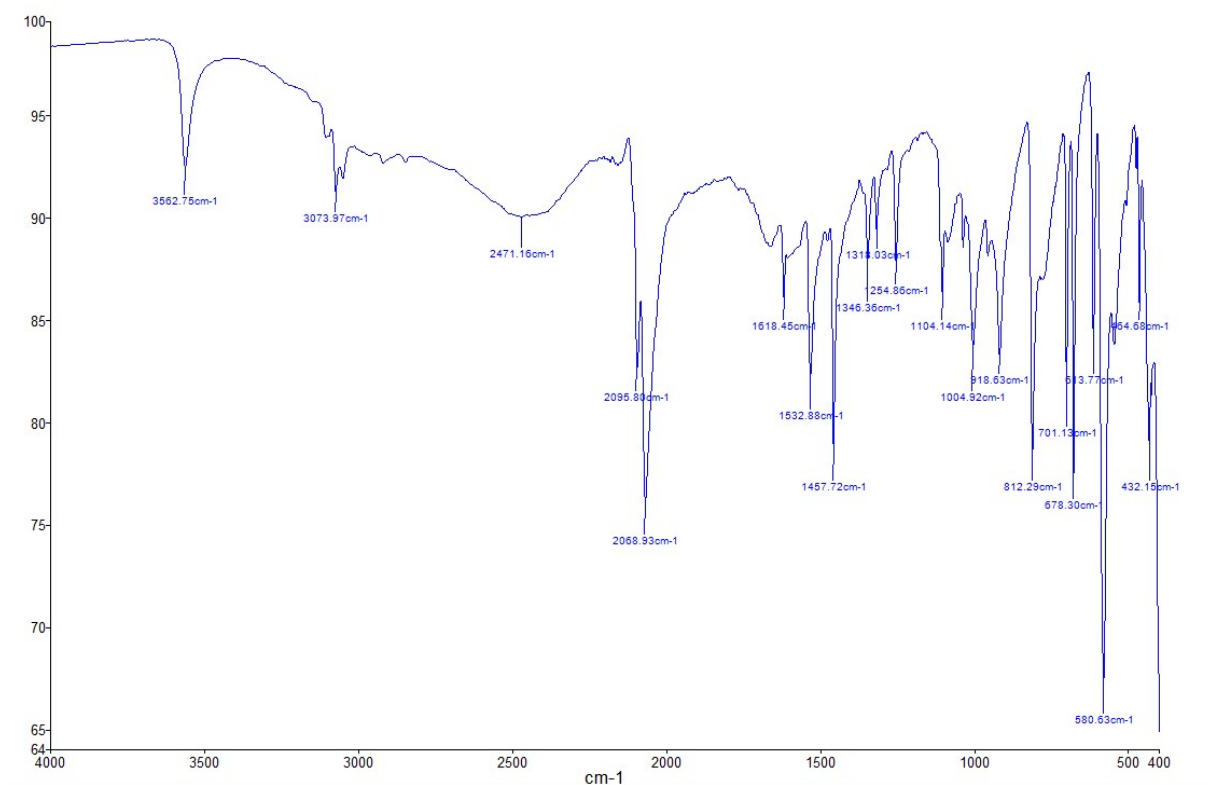

Figure S21. IR spectra of V.

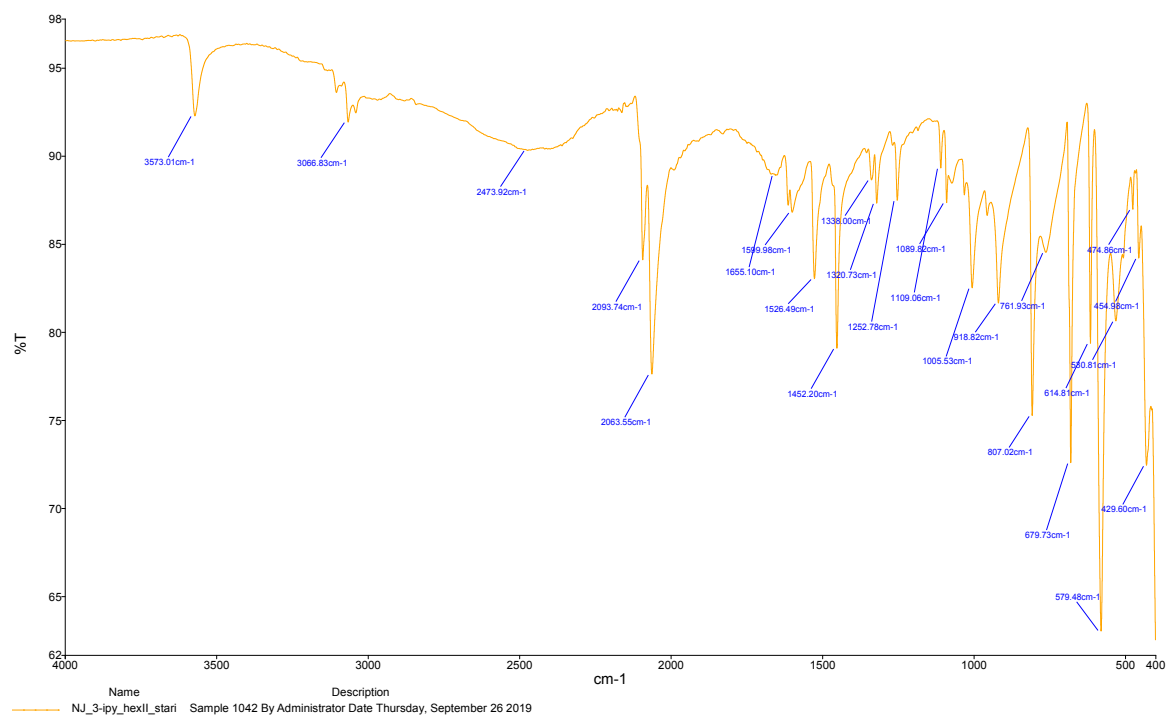

Figure S22. IR spectra of VI.

Table S2. Number of datasets in the CSD comprising protonated halogenopyridinium cation.

|              | Cl <sup>-</sup> | Br <sup>-</sup> | I <sup>-</sup> | O | N | other |
|--------------|-----------------|-----------------|----------------|---|---|-------|
| <b>2ClPy</b> | 4               | 2               |                | 2 |   |       |
| <b>2BrPy</b> | 7               | 13              | 3              |   |   |       |
| <b>2Ipy</b>  | 2               | 4               |                |   |   |       |
| <b>3ClPy</b> | 6               | 2               | 1              | 1 |   | 4     |
| <b>3BrPy</b> | 8               | 10              | 4              | 3 |   |       |
| <b>3Ipy</b>  | 7               | 5               | 1              | 1 |   |       |
| <b>4ClPy</b> | 14              | 7               | 3              | 1 |   |       |
| <b>4BrPy</b> | 12              | 9               | 3              | 2 |   | 1     |
| <b>4Ipy</b>  | 4               | 2               | 1              | 3 |   | 1     |

## References

1. Oxford Diffraction (2003), CrysAlis CCD and CrysAlis RED. Version 1.170., Oxford Diffraction Ltd, Wroclaw, Poland.
2. G. M. Sheldrick, *Acta Cryst.* 2008, **A64**, 112.
3. L. J. Farrugia, *J. Appl. Cryst.*, 1999, **32**, 837.
4. L. J. Farrugia, *J. Appl. Cryst.*, 1997, **30**, 565.
5. C. F. Macrae, I. J. Bruno, J. A. Chisholm, P. R. Edgington, P. McCabe, E. Pidcock, L. Rodriguez-Monge, R. Taylor, J. van de Streek and P. A. Wood, *J. Appl. Cryst.* 2008, **41**, 466.
6. R. H. Linnell, *J. Org. Chem.*, 1960, **25**, 290.
7. A. Gero and J. J. Markham, *J. Org. Chem.* 1951, 16, 12, 1835–1838.
